# Supplementary material for: Identifying Conserved and Novel MicroRNAs in Developing Seeds of Brassica napus Using Deep Sequencing
Source: PubMed Central journal article supplement (PMC3511302; doi:10.1371/journal.pone.0050663), 2012-11-30

**Fig. S2.** Secondary structures of the new *B.napus* miRNA candidate precursors of known plant miRNA families and location small RNAs mapped to these precursors.

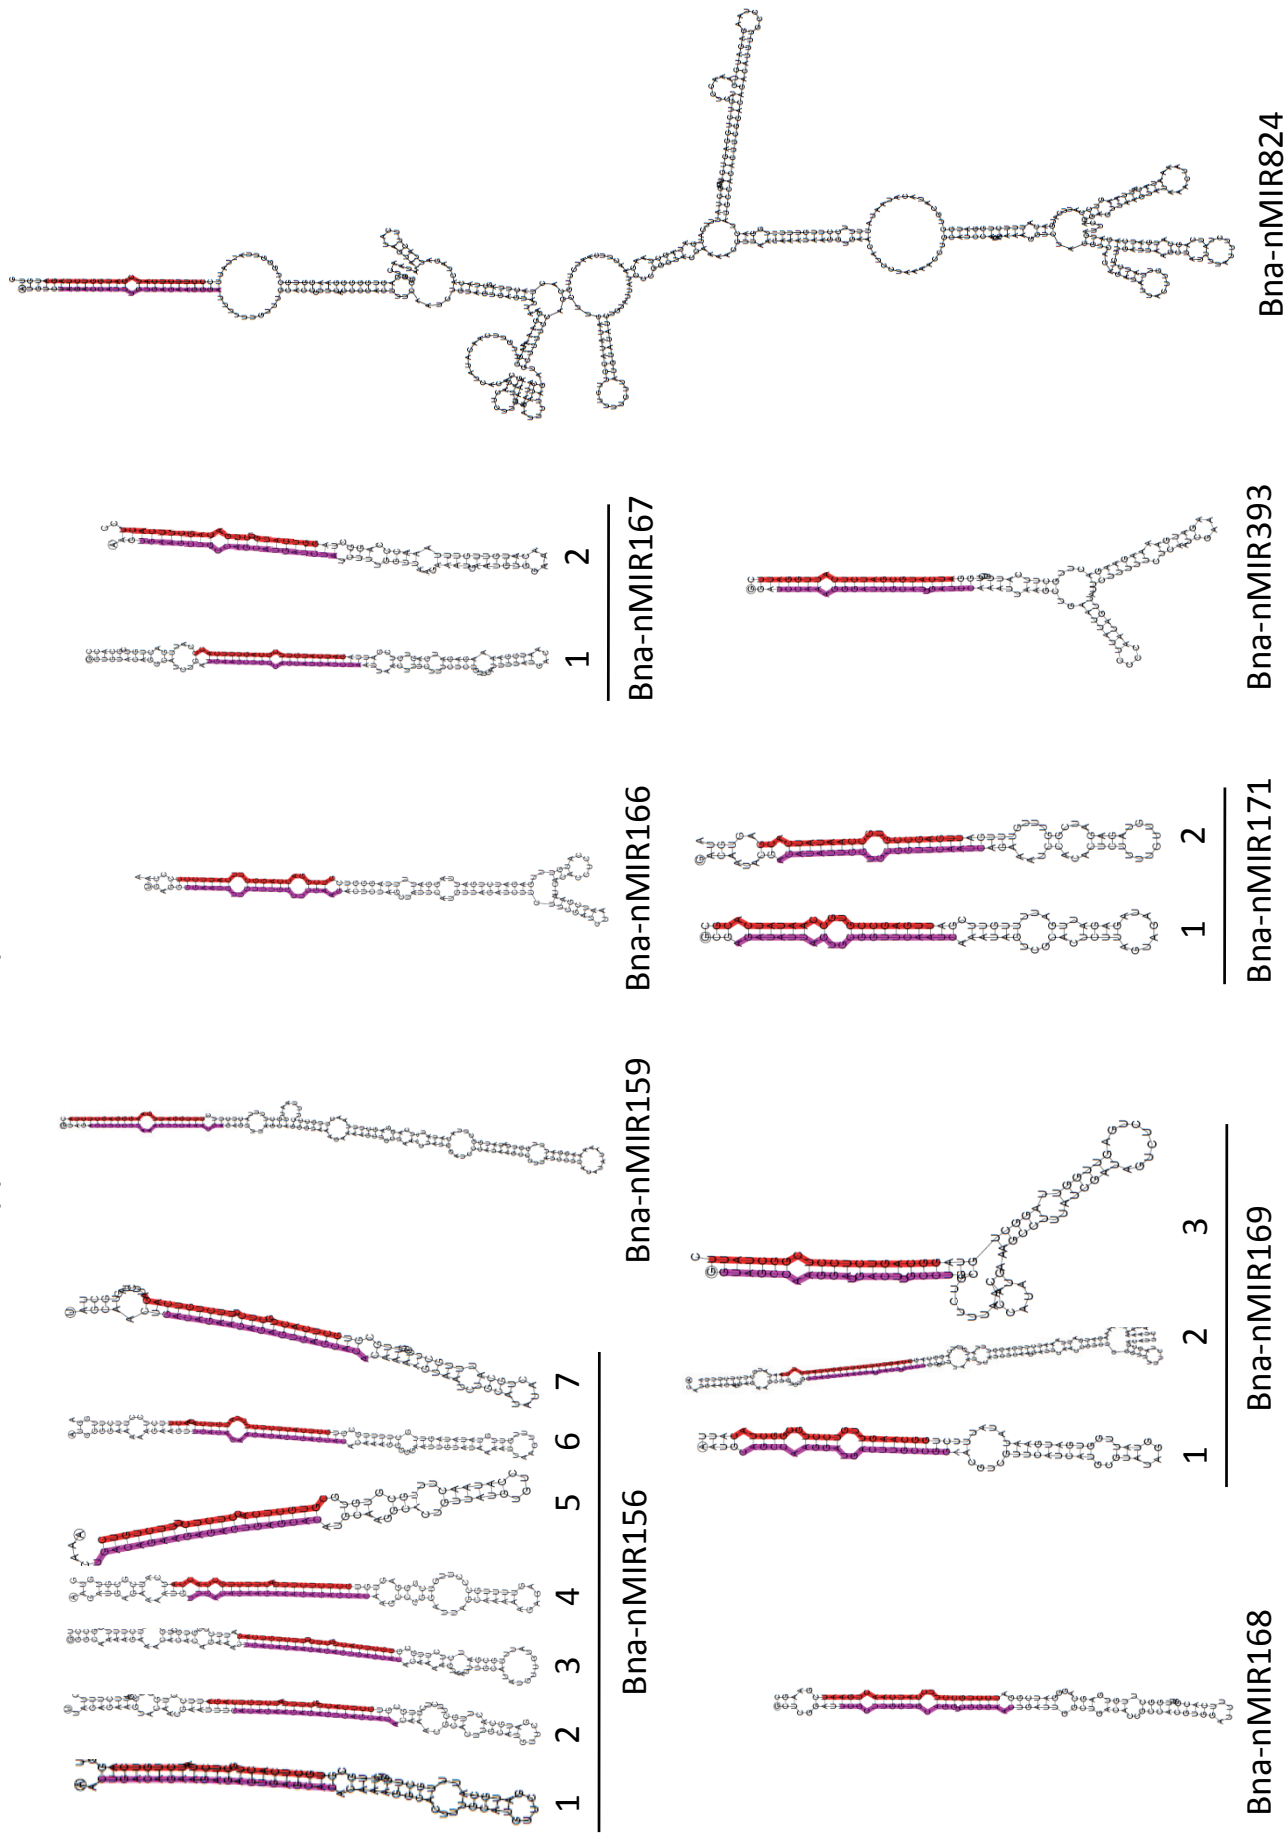

Supplement: pone.0050663.s002.pdf [file pone.0050663.s002.pdf]
