# Supplementary material for: Identifying Conserved and Novel MicroRNAs in Developing Seeds of Brassica napus Using Deep Sequencing
Source: PubMed Central journal article supplement (PMC3511302; doi:10.1371/journal.pone.0050663), 2012-11-30

## Bna-nMIR408

```

1 |
mir408 100.0% TAAAGAAGACAAAAGTGGTAACCAAGAGAGACAGGGAACAGCAGAGCAATGAGTTTACCAAAACATCAAAATGACTATGTTGGTCTCTCCCATGCCACTGCCCTTCCCTGCTCCCTGTTTCTCCTCCCTTCTCTTTTT ] 149
87_70 100.0% -----ACAGGGAAACAAGCAGAGCATG-----TCCACTGCCCTCTTCCCTGSET-----
25_5 100.0% -----ATGCCACTGCCCTCTTCCCTGGC-----
20_11 100.0% -----

```

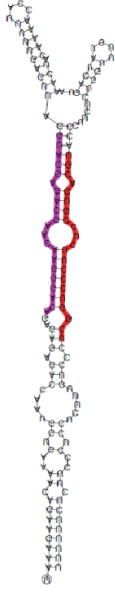

## Bna-nMIR827

```

1 |
mir827 100.0% TGTGTTTGTGATTGACATCTATGCATATTGATCATCCTCGTGTGATGATCGATTGGTTTAGATGACCATCAACAAATAC .] 81
17_12 100.0% -----TTTGTGATTGACATCTATGC-----
197_136 100.0% -----TTAGATGACCATCAACAAATA-----

```

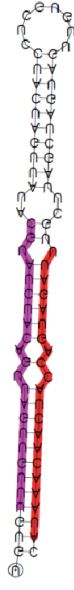

## Bna-nMIR394

```
1 [ . . . . . : 1 . . . . . : ] 152
1 mir394_contig45638 100.0% CCTTATTGTACCTCCTCTGATTACATACGCGGAAAGGAAAGAAAGTTTGTATCGCGGTTTCACAAAAGATTTCTATAGATACTTTGGCATTCTGTCCACCTCCTACATATGTATGGAGCATGTTCTGTGAGT
2 155_133 100.0% -----TTGGCATTCTGTCCACCTCC-----
3 506_168 100.0% -----TTGGCATTCTGTCCACCTCC-----
```

## Bna-nMIR396

```
1 [ . . . . . : 1 . . . . . : ] 100
1 mir396_contig77341 100.0% AAATAACTAAAAATCTCTAACATTTAACACTCTAGAAAAAAAAGCTCAAGAAAAGCTGTGGGAAAACATGACAAATTCAGGGTTTTCTTCATTGATTCAAAG
2 10_277 100.0% -----GCTCAAGAAAAGCTGTGGGAAA-----
3 0_19 100.0% -----AGCTCAAGAAAAGCTGTGGGAAA-----
4 12_199 100.0% -----CTCAAGAAAAGCTGTGGGAAA-----
5 7_169 100.0% -----AAGCTCAAGAAAAGCTGTGGGA-----
6 0_14 100.0% -----CTCAAGAAAAGCTGTGGGAAAA-----
7 0_8 100.0% -----GCTCAAGAAAAGCTGTGGGA-----
8 0_11 100.0% -----AAAGCTGTGGGAAAACATGAC-----
9 0_10 100.0% -----AAGCTGTGGGAAAACATGACA-----
```











# Bna-nMIR07

```

1 |
mi.r07-1 100.0% CATGGCGTCAAGCACTGAACTCTCTCAAGTTCAACCAATCACTGGTCTTCTTCTACATCCTCAGTTGCAGTTGACAAATCTAGATGAAGAAGAGAGATTCAGATGCTGTGAGGGCAAAAT
7 2 100.0% -----CGCTCAGCACTGAACTCT-----
6 2 100.0% -----AGAGATTCAGATGCTGTGAG-----

```

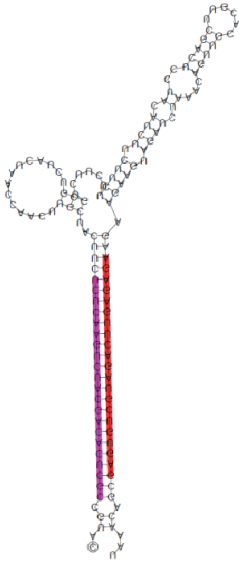

```

1 |
mi.r07-2 100.0% ATTTGCGTCACAGCACTGAACTCTTCTTCTCACTAGATTTGTCAACGTGCAAGCTGAGGATGTAGAGAGAGAGAGAGAGAGAGAGAGAGATTCAGATGCTGTGAGGGCATG
7 2 100.0% -----CGCTCAGCACTGAACTCT-----
13 6 100.0% -----AGTTCAGATGCTGTGAGGGCC-----
6 2 100.0% -----AGAGATTCAGATGCTGTGAG-----

```

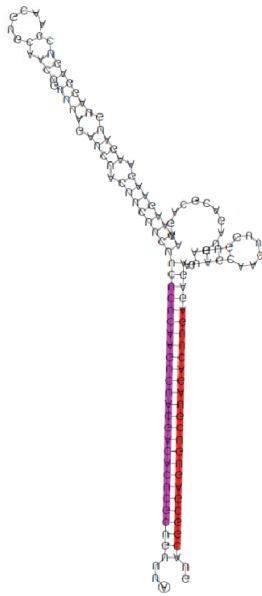

Supplement: pone.0050663.s003.pdf [file pone.0050663.s003.pdf]
